# Supplementary material for: Modifiable Risk Factors for Intracranial Aneurysm and Aneurysmal Subarachnoid Hemorrhage: A Mendelian Randomization Study
Source: PubMed Central journal article supplement — J Am Heart Assoc. 2021 Nov 3;10(22):e022277. doi: 10.1161/JAHA.121.022277 (PMC8751955; doi:10.1161/jaha.121.022277), 2021-11-03
Supplement: JAH3-10-e022277-s001.pdf [file JAH3-10-e022277-s001.pdf]

# SUPPLEMENTAL MATERIAL

**Supplemental material for:**

Modifiable Risk Factors for Intracranial Aneurysm and Aneurysmal Subarachnoid Hemorrhage: A Mendelian Randomization Study

Table S1

Table S2

Figure S1

**Table S1.** Minimum detectable odds ratios\*

| <b>Exposure</b>                             | <b>Intracranial aneurysm</b> | <b>Subarachnoid hemorrhage</b> |
|---------------------------------------------|------------------------------|--------------------------------|
| <b>Alcohol consumption</b>                  | > 1.98, < 0.50               | > 2.44, < 0.41                 |
| <b>Body mass index</b>                      | > 1.14, < 0.88               | > 1.18, < 0.85                 |
| <b>Blood urea nitrogen</b>                  | > 1.30, < 0.77               | > 1.39, < 0.72                 |
| <b>Caffeine consumption</b>                 | > 1.99, < 0.50               | > 2.29, < 0.44                 |
| <b>Chronic kidney disease</b>               | NA                           | NA                             |
| <b>Coffee consumption</b>                   | > 1.86, < 0.54               | > 2.15, < 0.47                 |
| <b>Diastolic blood pressure</b>             | > 1.16, < 0.86               | > 1.21, < 0.83                 |
| <b>eGFR</b>                                 | > 1.25, < 0.80               | > 1.32, < 0.76                 |
| <b>Fasting glucose</b>                      | > 1.25, < 0.80               | > 1.31, < 0.76                 |
| <b>Fasting insulin</b>                      | > 2.05, < 0.49               | > 2.45, < 0.41                 |
| <b>HbA1c</b>                                | > 1.31, < 0.77               | > 1.39, < 0.72                 |
| <b>High-density lipoprotein cholesterol</b> | > 1.14, < 0.88               | > 1.18, < 0.85                 |
| <b>Interleukin-6 receptor</b>               | > 1.73, < 0.58               | > 1.93, < 0.52                 |
| <b>Insomnia</b>                             | NA                           | NA                             |
| <b>Low-density lipoprotein cholesterol</b>  | > 1.13, < 0.88               | > 1.14, < 0.87                 |
| <b>Physical activity</b>                    | > 3.75, < 0.27               | > 5.55, < 0.18                 |
| <b>Systolic blood pressure</b>              | > 1.22, < 0.82               | > 1.30, < 0.77                 |
| <b>Sleep duration</b>                       | > 1.70, < 0.59               | > 1.97, < 0.51                 |
| <b>Long sleep duration</b>                  | NA                           | NA                             |
| <b>Short sleep duration</b>                 | NA                           | NA                             |
| <b>Smoking index</b>                        | > 1.48, < 0.68               | > 1.69, < 0.59                 |
| <b>Smoking initiation</b>                   | NA                           | NA                             |
| <b>Type 2 diabetes mellitus</b>             | NA                           | NA                             |
| <b>Triglycerides</b>                        | > 1.17, < 0.85               | > 1.21, < 0.82                 |

\*Minimum detectable odds ratio for the continuous exposures with 80% power ( $\alpha = 0.05$ ) and based on the exposure genome-wide association study sample size and the sum of the variance explained by the individual genetic instruments.

**Table S2.** Associations of genetically predicted exposures and intracranial aneurysm and aneurysmal subarachnoid hemorrhage in main and sensitivity analyses

| Group     | Exposure             | Outcome | Method          | SNPs | OR     | 95%_CI_low | 95%_CI_high | p-value  | p-value pleiotropy |
|-----------|----------------------|---------|-----------------|------|--------|------------|-------------|----------|--------------------|
| Lifestyle | Smoking index        | IA      | IVW-RE          | 85   | 3,1985 | 1,9347     | 5,2878      | 5,82E-06 |                    |
| Lifestyle | Smoking index        | IA      | MR-Egger        | 85   | 8,0469 | 0,9194     | 70,4329     | 0,0596   | 0,3915             |
| Lifestyle | Smoking index        | IA      | Weighted Median | 85   | 3,3335 | 1,7879     | 6,2155      | 0,0002   |                    |
| Lifestyle | Smoking index        | IA      | Weighted Mode   | 85   | 2,0699 | 0,3743     | 11,4477     | 0,4045   |                    |
| Lifestyle | Smoking initiation   | IA      | IVW-RE          | 235  | 1,8484 | 1,4952     | 2,2850      | 0,0000   |                    |
| Lifestyle | Smoking initiation   | IA      | MR-Egger        | 235  | 2,7557 | 1,1367     | 6,6805      | 0,0249   | 0,3626             |
| Lifestyle | Smoking initiation   | IA      | Weighted Median | 235  | 2,0337 | 1,5197     | 2,7216      | 1,37E-08 |                    |
| Lifestyle | Smoking initiation   | IA      | Weighted Mode   | 235  | 1,6888 | 0,7564     | 3,7705      | 0,2010   |                    |
| Lifestyle | Insomnia             | IA      | IVW-RE          | 143  | 1,2382 | 1,0978     | 1,3965      | 0,0005   |                    |
| Lifestyle | Insomnia             | IA      | MR-Egger        | 143  | 1,1186 | 0,6081     | 2,0574      | 0,7186   | 0,7389             |
| Lifestyle | Insomnia             | IA      | Weighted Median | 143  | 1,2743 | 1,0767     | 1,5081      | 0,0048   |                    |
| Lifestyle | Insomnia             | IA      | Weighted Mode   | 143  | 1,2266 | 0,7388     | 2,0366      | 0,4298   |                    |
| Lifestyle | Caffeine consumption | IA      | IVW-RE          | 2    | 1,2257 | 0,9297     | 1,6160      | 0,1490   |                    |
| Lifestyle | Short sleep duration | IA      | IVW-RE          | 19   | 1,1220 | 0,7032     | 1,7903      | 0,6292   |                    |
| Lifestyle | Short sleep duration | IA      | MR-Egger        | 19   | 1,0288 | 0,1147     | 9,2258      | 0,9798   | 0,9367             |
| Lifestyle | Short sleep duration | IA      | Weighted Median | 19   | 1,0992 | 0,6332     | 1,9083      | 0,7367   |                    |
| Lifestyle | Short sleep duration | IA      | Weighted Mode   | 19   | 1,1241 | 0,4724     | 2,6748      | 0,7915   |                    |
| Lifestyle | Alcohol consumption  | IA      | IVW-RE          | 56   | 0,8622 | 0,3885     | 1,9137      | 0,7155   |                    |
| Lifestyle | Alcohol consumption  | IA      | MR-Egger        | 56   | 0,5845 | 0,0700     | 4,8821      | 0,6200   | 0,6982             |
| Lifestyle | Alcohol consumption  | IA      | Weighted Median | 56   | 0,7160 | 0,2599     | 1,9731      | 0,5184   |                    |
| Lifestyle | Alcohol consumption  | IA      | Weighted Mode   | 56   | 0,4892 | 0,1184     | 2,0214      | 0,3233   |                    |
| Lifestyle | Coffee consumption   | IA      | IVW-RE          | 10   | 0,8269 | 0,4875     | 1,4028      | 0,4810   |                    |
| Lifestyle | Coffee consumption   | IA      | MR-Egger        | 10   | 1,1072 | 0,3563     | 3,4409      | 0,8602   | 0,5641             |
| Lifestyle | Coffee consumption   | IA      | Weighted Median | 10   | 1,0034 | 0,5472     | 1,8398      | 0,9913   |                    |
| Lifestyle | Coffee consumption   | IA      | Weighted Mode   | 10   | 1,1311 | 0,6027     | 2,1228      | 0,7013   |                    |
| Lifestyle | Long sleep duration  | IA      | IVW-RE          | 4    | 0,7968 | 0,4875     | 1,3023      | 0,3648   |                    |

|                 |                          |    |                 |     |        |        |          |          |        |
|-----------------|--------------------------|----|-----------------|-----|--------|--------|----------|----------|--------|
| Lifestyle       | Long sleep duration      | IA | MR-Egger        | 4   | 1,1545 | 0,1654 | 8,0601   | 0,8848   | 0,6991 |
| Lifestyle       | Long sleep duration      | IA | Weighted Median | 4   | 0,7161 | 0,3968 | 1,2924   | 0,2677   |        |
| Lifestyle       | Long sleep duration      | IA | Weighted Mode   | 4   | 0,6545 | 0,3130 | 1,3687   | 0,2601   |        |
| Lifestyle       | Sleep duration           | IA | IVW-RE          | 54  | 0,7134 | 0,4228 | 1,2040   | 0,2060   |        |
| Lifestyle       | Sleep duration           | IA | MR-Egger        | 54  | 1,0103 | 0,1473 | 6,9304   | 0,9917   | 0,7127 |
| Lifestyle       | Sleep duration           | IA | Weighted Median | 54  | 0,6403 | 0,3084 | 1,3291   | 0,2315   |        |
| Lifestyle       | Sleep duration           | IA | Weighted Mode   | 54  | 0,5593 | 0,1722 | 1,8167   | 0,3337   |        |
| Lifestyle       | Physical activity        | IA | IVW-RE          | 6   | 0,2196 | 0,0322 | 1,4982   | 0,1218   |        |
| Lifestyle       | Physical activity        | IA | MR-Egger        | 6   | 0,0011 | 0,0000 | 78,5456  | 0,2314   | 0,3442 |
| Lifestyle       | Physical activity        | IA | Weighted Median | 6   | 0,0999 | 0,0130 | 0,7686   | 0,0269   |        |
| Lifestyle       | Physical activity        | IA | Weighted Mode   | 6   | 0,0553 | 0,0031 | 0,9971   | 0,0498   |        |
| Cardiometabolic | Diastolic blood pressure | IA | IVW-RE          | 721 | 2,9227 | 2,4925 | 3,4271   | 8,38E-40 |        |
| Cardiometabolic | Diastolic blood pressure | IA | MR-Egger        | 721 | 5,4346 | 3,5999 | 8,2041   | 8,88E-16 | 0,0014 |
| Cardiometabolic | Diastolic blood pressure | IA | Weighted Median | 721 | 2,8770 | 2,2997 | 3,5993   | 2,29E-20 |        |
| Cardiometabolic | Diastolic blood pressure | IA | Weighted Mode   | 721 | 2,6370 | 1,1465 | 6,0651   | 0,0225   |        |
| Cardiometabolic | Blood urea nitrogen      | IA | IVW-RE          | 67  | 1,9416 | 0,7231 | 5,2134   | 0,1880   |        |
| Cardiometabolic | Blood urea nitrogen      | IA | MR-Egger        | 67  | 2,7888 | 0,1878 | 41,4029  | 0,4562   | 0,7772 |
| Cardiometabolic | Blood urea nitrogen      | IA | Weighted Median | 67  | 1,1348 | 0,2854 | 4,5131   | 0,8575   |        |
| Cardiometabolic | Blood urea nitrogen      | IA | Weighted Mode   | 67  | 0,4220 | 0,0613 | 2,9073   | 0,3809   |        |
| Cardiometabolic | Systolic blood pressure  | IA | IVW-RE          | 214 | 1,8696 | 1,6117 | 2,1687   | 1,42E-16 |        |
| Cardiometabolic | Systolic blood pressure  | IA | MR-Egger        | 214 | 3,6572 | 2,2723 | 5,8861   | 9,29E-08 | 0,0037 |
| Cardiometabolic | Systolic blood pressure  | IA | Weighted Median | 214 | 1,7832 | 1,4970 | 2,1242   | 9,18E-11 |        |
| Cardiometabolic | Systolic blood pressure  | IA | Weighted Mode   | 214 | 1,4929 | 0,9253 | 2,4089   | 0,1007   |        |
| Cardiometabolic | eGFR                     | IA | IVW-RE          | 235 | 1,6261 | 0,4839 | 5,4645   | 0,4317   |        |
| Cardiometabolic | eGFR                     | IA | MR-Egger        | 235 | 0,0588 | 0,0030 | 1,1632   | 0,0628   | 0,0173 |
| Cardiometabolic | eGFR                     | IA | Weighted Median | 235 | 1,5335 | 0,2371 | 9,9198   | 0,6536   |        |
| Cardiometabolic | eGFR                     | IA | Weighted Mode   | 235 | 3,2552 | 0,0544 | 194,9203 | 0,5719   |        |
| Cardiometabolic | Triglycerides            | IA | IVW-RE          | 60  | 1,1870 | 1,0196 | 1,3819   | 0,0271   |        |
| Cardiometabolic | Triglycerides            | IA | MR-Egger        | 60  | 1,0621 | 0,8386 | 1,3452   | 0,6170   | 0,2295 |
| Cardiometabolic | Triglycerides            | IA | Weighted Median | 60  | 1,1392 | 0,9120 | 1,4231   | 0,2508   |        |

|                 |                          |    |                 |     |        |        |         |        |        |
|-----------------|--------------------------|----|-----------------|-----|--------|--------|---------|--------|--------|
| Cardiometabolic | Triglycerides            | IA | Weighted Mode   | 60  | 1,1751 | 0,9535 | 1,4482  | 0,1302 |        |
| Cardiometabolic | Body mass index          | IA | IVW-RE          | 967 | 1,1537 | 1,0095 | 1,3186  | 0,0359 |        |
| Cardiometabolic | Body mass index          | IA | MR-Egger        | 967 | 0,9867 | 0,6767 | 1,4386  | 0,9445 | 0,3848 |
| Cardiometabolic | Body mass index          | IA | Weighted Median | 967 | 1,1991 | 0,9742 | 1,4760  | 0,0866 |        |
| Cardiometabolic | Body mass index          | IA | Weighted Mode   | 967 | 1,4877 | 0,9178 | 2,4114  | 0,1070 |        |
| Cardiometabolic | Chronic kidney disease   | IA | IVW-RE          | 21  | 1,1440 | 0,9001 | 1,4539  | 0,2714 |        |
| Cardiometabolic | Chronic kidney disease   | IA | MR-Egger        | 21  | 1,9347 | 1,0206 | 3,6677  | 0,0431 | 0,0847 |
| Cardiometabolic | Chronic kidney disease   | IA | Weighted Median | 21  | 1,3581 | 1,0875 | 1,6959  | 0,0069 |        |
| Cardiometabolic | Chronic kidney disease   | IA | Weighted Mode   | 21  | 1,3350 | 1,0083 | 1,7675  | 0,0436 |        |
| Cardiometabolic | Type 2 diabetes mellitus | IA | IVW-RE          | 422 | 1,0136 | 0,9458 | 1,0863  | 0,7024 |        |
| Cardiometabolic | Type 2 diabetes mellitus | IA | MR-Egger        | 422 | 0,8829 | 0,7568 | 1,0300  | 0,1132 | 0,0496 |
| Cardiometabolic | Type 2 diabetes mellitus | IA | Weighted Median | 422 | 0,9718 | 0,8753 | 1,0790  | 0,5925 |        |
| Cardiometabolic | Type 2 diabetes mellitus | IA | Weighted Mode   | 422 | 0,8695 | 0,7288 | 1,0373  | 0,1204 |        |
| Cardiometabolic | HbA1c                    | IA | IVW-RE          | 34  | 0,9683 | 0,5378 | 1,7434  | 0,9144 |        |
| Cardiometabolic | HbA1c                    | IA | MR-Egger        | 34  | 0,9770 | 0,1810 | 5,2742  | 0,9784 | 0,9911 |
| Cardiometabolic | HbA1c                    | IA | Weighted Median | 34  | 0,9230 | 0,3941 | 2,1614  | 0,8535 |        |
| Cardiometabolic | HbA1c                    | IA | Weighted Mode   | 34  | 0,9447 | 0,2964 | 3,0109  | 0,9234 |        |
| Cardiometabolic | Fasting insulin          | IA | IVW-RE          | 9   | 0,9585 | 0,1691 | 5,4332  | 0,9618 |        |
| Cardiometabolic | Fasting insulin          | IA | MR-Egger        | 9   | 0,2732 | 0,0000 | 4248511 | 0,8779 | 0,8812 |
| Cardiometabolic | Fasting insulin          | IA | Weighted Median | 9   | 0,4446 | 0,0762 | 2,5954  | 0,3679 |        |
| Cardiometabolic | Fasting insulin          | IA | Weighted Mode   | 9   | 0,1236 | 0,0026 | 5,9757  | 0,2907 |        |
| Cardiometabolic | HDL cholesterol          | IA | IVW-RE          | 113 | 0,9317 | 0,8244 | 1,0531  | 0,2576 |        |
| Cardiometabolic | HDL cholesterol          | IA | MR-Egger        | 113 | 1,0550 | 0,8452 | 1,3168  | 0,6359 | 0,1882 |
| Cardiometabolic | HDL cholesterol          | IA | Weighted Median | 113 | 0,9145 | 0,7597 | 1,1010  | 0,3453 |        |
| Cardiometabolic | HDL cholesterol          | IA | Weighted Mode   | 113 | 0,9361 | 0,7769 | 1,1279  | 0,4874 |        |
| Cardiometabolic | LDL cholesterol          | IA | IVW-RE          | 88  | 0,8959 | 0,7842 | 1,0234  | 0,1054 |        |
| Cardiometabolic | LDL cholesterol          | IA | MR-Egger        | 88  | 0,9669 | 0,7810 | 1,1970  | 0,7570 | 0,3705 |
| Cardiometabolic | LDL cholesterol          | IA | Weighted Median | 88  | 0,9705 | 0,8179 | 1,1515  | 0,7314 |        |
| Cardiometabolic | LDL cholesterol          | IA | Weighted Mode   | 88  | 0,9845 | 0,8373 | 1,1576  | 0,8504 |        |
| Cardiometabolic | Interleukin-6 receptor   | IA | IVW-RE          | 2   | 0,8049 | 0,4865 | 1,3318  | 0,3983 |        |

|                 |                      |      |                 |     |         |        |          |          |        |
|-----------------|----------------------|------|-----------------|-----|---------|--------|----------|----------|--------|
| Cardiometabolic | Fasting glucose      | IA   | IVW-RE          | 32  | 0,6391  | 0,4278 | 0,9548   | 0,0288   |        |
| Cardiometabolic | Fasting glucose      | IA   | MR-Egger        | 32  | 1,0586  | 0,5040 | 2,2238   | 0,8804   | 0,1165 |
| Cardiometabolic | Fasting glucose      | IA   | Weighted Median | 32  | 0,8572  | 0,5222 | 1,4072   | 0,5424   |        |
| Cardiometabolic | Fasting glucose      | IA   | Weighted Mode   | 32  | 0,8269  | 0,5193 | 1,3167   | 0,4233   |        |
| Lifestyle       | Smoking index        | aSAH | IVW-RE          | 66  | 2,9861  | 1,5538 | 5,7388   | 0,0010   |        |
| Lifestyle       | Smoking index        | aSAH | MR-Egger        | 66  | 25,6901 | 1,6637 | 396,6874 | 0,0201   | 0,1128 |
| Lifestyle       | Smoking index        | aSAH | Weighted Median | 66  | 2,0573  | 0,9239 | 4,5814   | 0,0774   |        |
| Lifestyle       | Smoking index        | aSAH | Weighted Mode   | 66  | 1,6760  | 0,2102 | 13,3657  | 0,6259   |        |
| Lifestyle       | Smoking initiation   | aSAH | IVW-RE          | 190 | 1,6217  | 1,2372 | 2,1257   | 0,0005   |        |
| Lifestyle       | Smoking initiation   | aSAH | MR-Egger        | 190 | 5,1285  | 1,7086 | 15,3938  | 0,0036   | 0,0343 |
| Lifestyle       | Smoking initiation   | aSAH | Weighted Median | 190 | 2,1689  | 1,5006 | 3,1348   | 3,79E-05 |        |
| Lifestyle       | Smoking initiation   | aSAH | Weighted Mode   | 190 | 3,0090  | 1,2050 | 7,5142   | 0,0183   |        |
| Lifestyle       | Insomnia             | aSAH | IVW-RE          | 109 | 1,1986  | 1,0252 | 1,4014   | 0,0231   |        |
| Lifestyle       | Insomnia             | aSAH | MR-Egger        | 109 | 1,1289  | 0,5396 | 2,3618   | 0,7475   | 0,8706 |
| Lifestyle       | Insomnia             | aSAH | Weighted Median | 109 | 1,1832  | 0,9527 | 1,4694   | 0,1280   |        |
| Lifestyle       | Insomnia             | aSAH | Weighted Mode   | 109 | 1,1230  | 0,6164 | 2,0460   | 0,7047   |        |
| Lifestyle       | Caffeine consumption | aSAH | IVW-RE          | 2   | 1,2035  | 0,8719 | 1,6611   | 0,2601   |        |
| Lifestyle       | Short sleep duration | aSAH | IVW-RE          | 14  | 1,4819  | 0,8809 | 2,4929   | 0,1383   |        |
| Lifestyle       | Short sleep duration | aSAH | MR-Egger        | 14  | 2,9471  | 0,1939 | 44,7913  | 0,4363   | 0,6139 |
| Lifestyle       | Short sleep duration | aSAH | Weighted Median | 14  | 1,4557  | 0,7107 | 2,9815   | 0,3047   |        |
| Lifestyle       | Short sleep duration | aSAH | Weighted Mode   | 14  | 1,3632  | 0,4629 | 4,0150   | 0,5740   |        |
| Lifestyle       | Alcohol consumption  | aSAH | IVW-RE          | 46  | 0,7232  | 0,3164 | 1,6530   | 0,4423   |        |
| Lifestyle       | Alcohol consumption  | aSAH | MR-Egger        | 46  | 0,9197  | 0,1040 | 8,1298   | 0,9400   | 0,8150 |
| Lifestyle       | Alcohol consumption  | aSAH | Weighted Median | 46  | 0,5593  | 0,1594 | 1,9622   | 0,3642   |        |
| Lifestyle       | Alcohol consumption  | aSAH | Weighted Mode   | 46  | 0,5455  | 0,0941 | 3,1627   | 0,4991   |        |
| Lifestyle       | Coffee consumption   | aSAH | IVW-RE          | 9   | 1,0027  | 0,5251 | 1,9147   | 0,9935   |        |
| Lifestyle       | Coffee consumption   | aSAH | MR-Egger        | 9   | 0,9359  | 0,2310 | 3,7912   | 0,9260   | 0,9115 |
| Lifestyle       | Coffee consumption   | aSAH | Weighted Median | 9   | 1,1272  | 0,5448 | 2,3320   | 0,7469   |        |
| Lifestyle       | Coffee consumption   | aSAH | Weighted Mode   | 9   | 1,1713  | 0,5101 | 2,6893   | 0,7093   |        |
| Lifestyle       | Long sleep duration  | aSAH | IVW-RE          | 4   | 0,7291  | 0,4032 | 1,3186   | 0,2960   |        |

|                 |                          |      |                 |     |        |        |           |          |        |
|-----------------|--------------------------|------|-----------------|-----|--------|--------|-----------|----------|--------|
| Lifestyle       | Long sleep duration      | aSAH | MR-Egger        | 4   | 0,7792 | 0,0761 | 7,9758    | 0,8335   | 0,9538 |
| Lifestyle       | Long sleep duration      | aSAH | Weighted Median | 4   | 0,7131 | 0,3504 | 1,4515    | 0,3511   |        |
| Lifestyle       | Long sleep duration      | aSAH | Weighted Mode   | 4   | 0,6907 | 0,2918 | 1,6347    | 0,3998   |        |
| Lifestyle       | Sleep duration           | aSAH | IVW-RE          | 47  | 0,6708 | 0,3669 | 1,2266    | 0,1947   |        |
| Lifestyle       | Sleep duration           | aSAH | MR-Egger        | 47  | 0,9375 | 0,1059 | 8,2972    | 0,9538   | 0,7540 |
| Lifestyle       | Sleep duration           | aSAH | Weighted Median | 47  | 0,5888 | 0,2445 | 1,4181    | 0,2376   |        |
| Lifestyle       | Sleep duration           | aSAH | Weighted Mode   | 47  | 0,6383 | 0,1593 | 2,5576    | 0,5261   |        |
| Lifestyle       | Physical activity        | aSAH | IVW-RE          | 5   | 0,0543 | 0,0063 | 0,4678    | 0,0080   |        |
| Lifestyle       | Physical activity        | aSAH | MR-Egger        | 5   | 0,0003 | 0,0000 | 133,9815  | 0,2250   | 0,4345 |
| Lifestyle       | Physical activity        | aSAH | Weighted Median | 5   | 0,0425 | 0,0034 | 0,5328    | 0,0144   |        |
| Lifestyle       | Physical activity        | aSAH | Weighted Mode   | 5   | 0,0181 | 0,0004 | 0,9122    | 0,0449   |        |
| Cardiometabolic | Diastolic blood pressure | aSAH | IVW-RE          | 651 | 3,2096 | 2,6627 | 3,8690    | 2,05E-34 |        |
| Cardiometabolic | Diastolic blood pressure | aSAH | MR-Egger        | 651 | 7,6051 | 4,6743 | 12,3735   | 2,22E-16 | 0,0002 |
| Cardiometabolic | Diastolic blood pressure | aSAH | Weighted Median | 651 | 3,1726 | 2,4245 | 4,1515    | 3,93E-17 |        |
| Cardiometabolic | Diastolic blood pressure | aSAH | Weighted Mode   | 651 | 2,6823 | 1,1950 | 6,0204    | 0,0168   |        |
| Cardiometabolic | Blood urea nitrogen      | aSAH | IVW-RE          | 64  | 1,4062 | 0,3942 | 5,0162    | 0,5993   |        |
| Cardiometabolic | Blood urea nitrogen      | aSAH | MR-Egger        | 64  | 1,3093 | 0,0387 | 44,2434   | 0,8807   | 0,9660 |
| Cardiometabolic | Blood urea nitrogen      | aSAH | Weighted Median | 64  | 1,5625 | 0,3023 | 8,0763    | 0,5943   |        |
| Cardiometabolic | Blood urea nitrogen      | aSAH | Weighted Mode   | 64  | 0,5288 | 0,0409 | 6,8434    | 0,6258   |        |
| Cardiometabolic | Systolic blood pressure  | aSAH | IVW-RE          | 188 | 2,1696 | 1,8236 | 2,5814    | 2,40E-18 |        |
| Cardiometabolic | Systolic blood pressure  | aSAH | MR-Egger        | 188 | 4,4641 | 2,5548 | 7,8001    | 1,49E-07 | 0,0078 |
| Cardiometabolic | Systolic blood pressure  | aSAH | Weighted Median | 188 | 2,0175 | 1,6240 | 2,5063    | 2,30E-10 |        |
| Cardiometabolic | Systolic blood pressure  | aSAH | Weighted Mode   | 188 | 1,5856 | 0,8395 | 2,9948    | 0,1554   |        |
| Cardiometabolic | eGFR                     | aSAH | IVW-RE          | 216 | 2,2873 | 0,4951 | 10,5671   | 0,2893   |        |
| Cardiometabolic | eGFR                     | aSAH | MR-Egger        | 216 | 0,4500 | 0,0095 | 21,2913   | 0,6849   | 0,3680 |
| Cardiometabolic | eGFR                     | aSAH | Weighted Median | 216 | 2,7807 | 0,3043 | 25,4133   | 0,3650   |        |
| Cardiometabolic | eGFR                     | aSAH | Weighted Mode   | 216 | 7,5182 | 0,0283 | 1999,2246 | 0,4788   |        |
| Cardiometabolic | Triglycerides            | aSAH | IVW-RE          | 54  | 1,1356 | 0,9571 | 1,3474    | 0,1450   |        |
| Cardiometabolic | Triglycerides            | aSAH | MR-Egger        | 54  | 0,9701 | 0,7424 | 1,2678    | 0,8242   | 0,1352 |
| Cardiometabolic | Triglycerides            | aSAH | Weighted Median | 54  | 1,1027 | 0,8510 | 1,4290    | 0,4595   |        |



|                 |                          |      |                 |     |        |        |          |        |        |
|-----------------|--------------------------|------|-----------------|-----|--------|--------|----------|--------|--------|
| Cardiometabolic | Triglycerides            | aSAH | Weighted Mode   | 54  | 1,1340 | 0,8821 | 1,4577   | 0,3266 |        |
| Cardiometabolic | Body mass index          | aSAH | IVW-RE          | 911 | 1,2077 | 1,0324 | 1,4129   | 0,0184 |        |
| Cardiometabolic | Body mass index          | aSAH | MR-Egger        | 911 | 1,0281 | 0,6605 | 1,6002   | 0,9024 | 0,4455 |
| Cardiometabolic | Body mass index          | aSAH | Weighted Median | 911 | 1,3317 | 1,0308 | 1,7204   | 0,0284 |        |
| Cardiometabolic | Body mass index          | aSAH | Weighted Mode   | 911 | 1,3125 | 0,7831 | 2,1999   | 0,3021 |        |
| Cardiometabolic | Chronic kidney disease   | aSAH | IVW-RE          | 21  | 1,0935 | 0,8356 | 1,4309   | 0,5149 |        |
| Cardiometabolic | Chronic kidney disease   | aSAH | MR-Egger        | 21  | 1,9333 | 0,9454 | 3,9536   | 0,0709 | 0,0942 |
| Cardiometabolic | Chronic kidney disease   | aSAH | Weighted Median | 21  | 1,2754 | 0,9836 | 1,6539   | 0,0664 |        |
| Cardiometabolic | Chronic kidney disease   | aSAH | Weighted Mode   | 21  | 1,2497 | 0,8998 | 1,7355   | 0,1835 |        |
| Cardiometabolic | Type 2 diabetes mellitus | aSAH | IVW-RE          | 383 | 0,9985 | 0,9208 | 1,0827   | 0,9708 |        |
| Cardiometabolic | Type 2 diabetes mellitus | aSAH | MR-Egger        | 383 | 0,9080 | 0,7568 | 1,0894   | 0,2990 | 0,2538 |
| Cardiometabolic | Type 2 diabetes mellitus | aSAH | Weighted Median | 383 | 0,9493 | 0,8387 | 1,0745   | 0,4102 |        |
| Cardiometabolic | Type 2 diabetes mellitus | aSAH | Weighted Mode   | 383 | 0,8650 | 0,7194 | 1,0401   | 0,1232 |        |
| Cardiometabolic | HbA1c                    | aSAH | IVW-RE          | 31  | 0,7825 | 0,3876 | 1,5797   | 0,4939 |        |
| Cardiometabolic | HbA1c                    | aSAH | MR-Egger        | 31  | 0,7914 | 0,1049 | 5,9727   | 0,8205 | 0,9907 |
| Cardiometabolic | HbA1c                    | aSAH | Weighted Median | 31  | 0,7521 | 0,2782 | 2,0337   | 0,5746 |        |
| Cardiometabolic | HbA1c                    | aSAH | Weighted Mode   | 31  | 0,6961 | 0,1882 | 2,5754   | 0,5874 |        |
| Cardiometabolic | Fasting insulin          | aSAH | IVW-RE          | 8   | 1,2434 | 0,1952 | 7,9211   | 0,8176 |        |
| Cardiometabolic | Fasting insulin          | aSAH | MR-Egger        | 8   | 0,0561 | 0,0000 | 6533732  | 0,7612 | 0,7423 |
| Cardiometabolic | Fasting insulin          | aSAH | Weighted Median | 8   | 1,4436 | 0,2098 | 9,9319   | 0,7091 |        |
| Cardiometabolic | Fasting insulin          | aSAH | Weighted Mode   | 8   | 6,4921 | 0,1167 | 361,0099 | 0,3616 |        |
| Cardiometabolic | HDL cholesterol          | aSAH | IVW-RE          | 102 | 0,9378 | 0,8047 | 1,0930   | 0,4112 |        |
| Cardiometabolic | HDL cholesterol          | aSAH | MR-Egger        | 102 | 1,1488 | 0,8753 | 1,5078   | 0,3174 | 0,0782 |
| Cardiometabolic | HDL cholesterol          | aSAH | Weighted Median | 102 | 0,8227 | 0,6587 | 1,0274   | 0,0852 |        |
| Cardiometabolic | HDL cholesterol          | aSAH | Weighted Mode   | 102 | 0,9166 | 0,7257 | 1,1577   | 0,4648 |        |
| Cardiometabolic | LDL cholesterol          | aSAH | IVW-RE          | 84  | 0,8890 | 0,7744 | 1,0205   | 0,0946 |        |
| Cardiometabolic | LDL cholesterol          | aSAH | MR-Egger        | 84  | 0,9771 | 0,8064 | 1,1838   | 0,8126 | 0,1677 |
| Cardiometabolic | LDL cholesterol          | aSAH | Weighted Median | 84  | 1,0165 | 0,8650 | 1,1946   | 0,8421 |        |
| Cardiometabolic | LDL cholesterol          | aSAH | Weighted Mode   | 84  | 0,9756 | 0,8481 | 1,1223   | 0,7294 |        |
| Cardiometabolic | Interleukin-6 receptor   | aSAH | IVW-RE          | 2   | 0,8197 | 0,4573 | 1,4695   | 0,5045 |        |

|                 |                 |      |                 |    |        |        |        |        |        |
|-----------------|-----------------|------|-----------------|----|--------|--------|--------|--------|--------|
| Cardiometabolic | Fasting glucose | aSAH | IVW-RE          | 27 | 0,5694 | 0,3435 | 0,9439 | 0,0290 |        |
| Cardiometabolic | Fasting glucose | aSAH | MR-Egger        | 27 | 0,9449 | 0,3643 | 2,4506 | 0,9072 | 0,2208 |
| Cardiometabolic | Fasting glucose | aSAH | Weighted Median | 27 | 0,8041 | 0,4430 | 1,4598 | 0,4737 |        |
| Cardiometabolic | Fasting glucose | aSAH | Weighted Mode   | 27 | 0,7492 | 0,4346 | 1,2916 | 0,2987 |        |

Abbreviations: aSAH, aneurysmal subarachnoid hemorrhage; CI, confidence interval; eGFR, estimated glomerular filtration rate; HDL, high-density lipoprotein cholesterol; IA, intracranial aneurysm; IVW-RE, inverse-variance weighted random effects; LDL, low-density lipoprotein; MR, Mendelian randomization; OR, odds ratio; SE, standard error; SNPs, single-nucleotide polymorphisms.

**Figure S1.** Associations of genetically predicted exposures and intracranial aneurysm and aneurysmal subarachnoid hemorrhage in main and sensitivity analyses

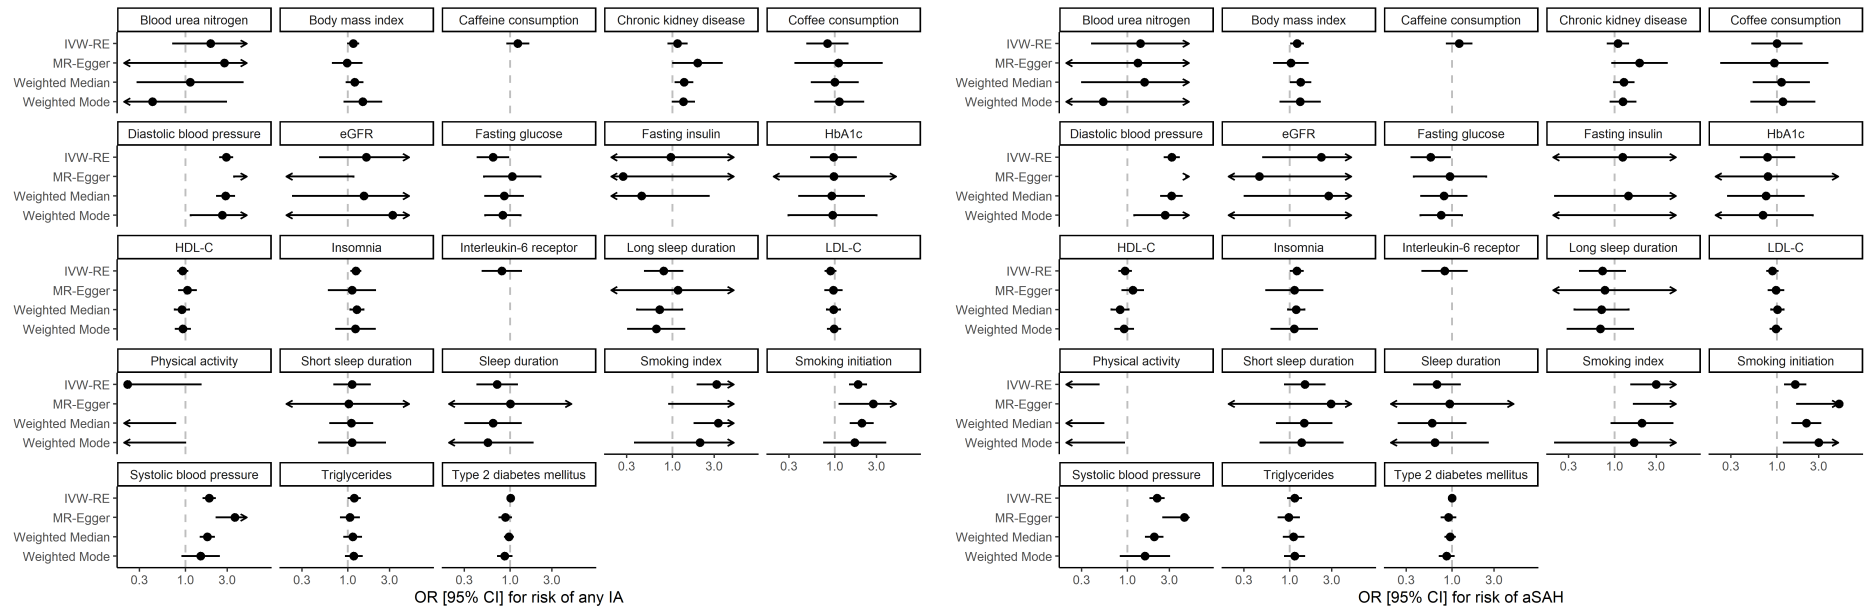

Abbreviations: aSAH, aneurysmal subarachnoid hemorrhage; CI, confidence interval; eGFR, estimated glomerular filtration rate; HDL, high-density lipoprotein cholesterol; IA, intracranial aneurysm; IVW-RE, inverse-variance weighted random effects; LDL, low-density lipoprotein; MR, Mendelian randomization; OR, odds ratio.
